# Supplementary material
Source: PubMed Central journal article supplement (PMC4693883)
Supplement: IMM-147-082-s005.pdf [file IMM-147-082-s005.pdf]

**Supplemental Table 1.** Primer sequences for qRT-PCR.

|              |                | <b>Sequence, 5' to 3'</b> |                            |
|--------------|----------------|---------------------------|----------------------------|
|              | 18S rRNA       | Forward                   | CCAGAGCGAAAGCATTGCGCAAGA   |
|              |                | Reverse                   | TCGGCATCGTTTATGGTCGGAAC    |
| <b>human</b> | CD206          | Forward                   | CAAAAAGGGCAACACCACTT       |
|              |                | Reverse                   | ACGAAGCCATTTGGTAAACG       |
|              | PPAR $\gamma$  | Forward                   | GCCAAGCTGCTCCAGAAAAT       |
|              |                | Reverse                   | TGATCACCTGCAGTAGCTGCA      |
|              | LXR $\alpha$   | Forward                   | AAGCCCTGCATGCCTACGT        |
|              |                | Reverse                   | TGCAGACGCAGTGCAAACA        |
| <b>mouse</b> | CD206          | Forward                   | GAAGAGCCCCTCTGTTTGCAG      |
|              |                | Reverse                   | TCCTTGAGTGATGGGACTGTG      |
|              | PPAR $\gamma$  | Forward                   | TGAATAAAGATGGAGTCCTCATCTCA |
|              |                | Reverse                   | CTTAGGCTCCATAAAGTCACCAAAG  |
|              | LXR $\alpha$   | Forward                   | TCATGCTTCTGGAGACGT         |
|              |                | Reverse                   | CTCAGCATCATTGAGTTGC        |
|              | Arg 1          | Forward                   | TGAACACGGCAGTGGCTTTA       |
|              |                | Reverse                   | GCATTCACAGTCACTTAGGTGGTTTA |
|              | iNOS           | Forward                   | GGAGCAGGTGGAAGACTATTTCTT   |
|              |                | Reverse                   | CATGATAACGTTTCTGGCTCTTGA   |
|              | CHOP           | Forward                   | CAGGGTCAAGAGTAGTGAAGGT     |
|              |                | Reverse                   | CTGGAAGCCTGGTATGAGGAT      |
|              | IRE-1 $\alpha$ | Forward                   | GACCGGCAGTTCCAGTACAT       |
|              |                | Reverse                   | TTGAGAGAATGCAGGTGTGC       |
|              | XBP-1s         | Forward                   | GAGTCCGCAGCAGGTG           |
|              |                | Reverse                   | GTGTCAGAGTCCATGGGA         |
|              | ATF6           | Forward                   | GTCAAAGCGAAGAGCTGTCTG      |
|              |                | Reverse                   | AGAGATGCCTCCTCTGATTGGC     |
